# Supplementary material for: A Protocol for Organoids from the Urine of Bladder Cancer Patients
Source: MDPI journal article supplement (doi:10.3390/cells12172188), 2023-08-31
Supplement: s1 [file s1]

**Table S1.** Antibodies employed for chamber slides and paraffin sections. Abbreviations: cs, chamber slides; ps, paraffin section

| Antibody         | Company                         | Dilution cs | Dilution ps | clone                                   | Catalog number                          |
|------------------|---------------------------------|-------------|-------------|-----------------------------------------|-----------------------------------------|
| Alexa488         | Jackson Immuno Research, UK     | 1:1000      | 1:1000      | -                                       | 115-165-166                             |
| DAPI             | Sigma Aldrich, USA              | 1:1000      | 1:1000      | -                                       | SigmaD8417 10mg/28,4ml H <sub>2</sub> O |
| Cy3              | Jackson Immuno Research, UK     | 1:1000      | 1:1000      | -                                       | 111-545-045                             |
| rb.Anti-GATA-3   | Abcam, UK                       | 1:100       | 1:50        | IgG, polyclonal                         | Ab106625                                |
| rb.Anti-CK7      | Abcam, UK                       | 1:300       | 1:100       | IgG, monoclonal<br>EPR1619Y             | Ab68459                                 |
| rb.Anti-CK5      | BioLegend, USA                  | 1:200       | 1:50        | Mainly IgG, polyclonal<br>poly19055     | 905504/100µg                            |
| rb.Anti-CD276    | Abcam, UK                       | 1:100       | 1:100       | IgG, polyclonal                         | Ab226256                                |
| rb.Anti-TP63     | Invitrogen, Thermo Fischer, USA | 1:100       | 1:50        | IgG, recombinant, monoclonal<br>10H7L17 | 703809                                  |
| rb.Anti-CD24     | Abcam, UK                       | 1:100       | 1:50        | IgG, EPR19925                           | Ab202073                                |
| rb.Anti-FGFR-3   | Abcam, UK                       | 1:100       | -           | IgG1, monoclonal<br>EPR2281(3)          | Ab155960                                |
| ms.Anti-AE1/AE3  | Merck, DE                       | 1:200       | 1:100       | IgG1, monoclonaler<br>clone AE1/AE3     | Mab3412                                 |
| ms.Anti-p53      | Invitrogen, Thermo Fischer, USA | 1:100       | 1:50        | IgG1, monoclonal,<br>PAb 240            | MA5-15244                               |
| ms.Anti-Vimentin | Becton Dickinson, USA           | 1:100       | 1:50        | IgG1, monoclonal,<br>RV202              | 550513                                  |
| ms.Anti-S-100-P  | Becton Dickinson, USA           | 1:100       | 1:100       | IgG1, monoclonal,<br>16/S100P           | 610306                                  |
| ms.Anti-CK20     | Merck, DE                       | 1:100       | 1:50        | IgMk, monoclonaler<br>Klon XQ1          | Mabt845-25UG                            |
| ms.Anti-FGFR-3   | Invitrogen, Thermo Fischer, USA | -           | 1:50        | IgG1, monoclonal<br>OTI1B10             | MA5-26493                               |
| ms.Anti-CD44     | Abcam, UK                       | 1:200       | 1:50        | IgG1, MEM-263                           | Ab9524                                  |
| ms.Anti-Ki67     | Biomol-Arigo,                   | 1:100       | 1:100       | IgG1, monoclonal,<br>ARG57562           | Arg57562                                |
