# Supplementary material for: A Protocol for Organoids from the Urine of Bladder Cancer Patients
Source: MDPI journal article supplement (doi:10.3390/cells12172188), 2023-08-31
Supplement: s1 [file s1]

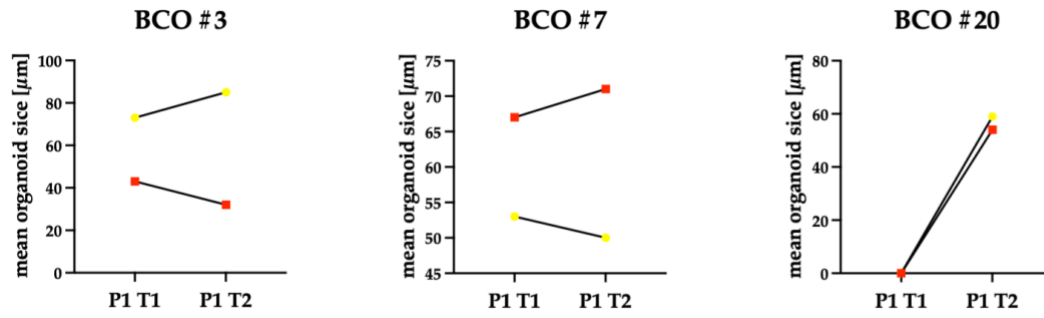

**Figure S1.** Exemplarily shown, mean growth of 3 paired cultures of urin- (indicated in yellow) and tissue-derived (indicated in red) BCOs of the same patient displaying individual growth patterns within a time span of 5 days in the 1<sup>st</sup> passage. Abbreviations: BCO, bladder cancer organoid; µm, micrometer.
