# Supplementary material for: A Protocol for Organoids from the Urine of Bladder Cancer Patients
Source: MDPI journal article supplement (doi:10.3390/cells12172188), 2023-08-31
Supplement: s1 [file s1]

uBCO#13

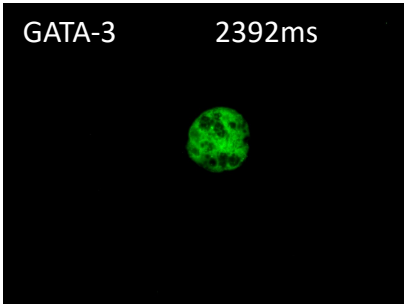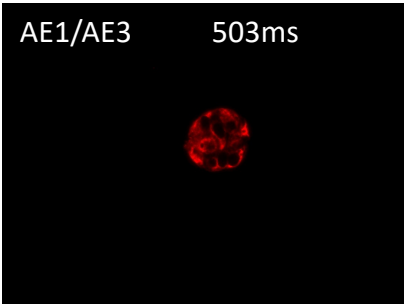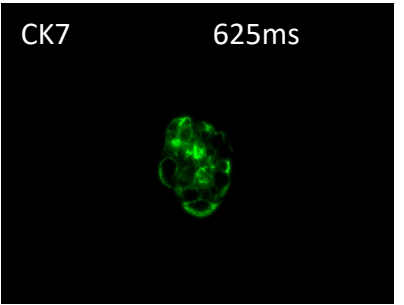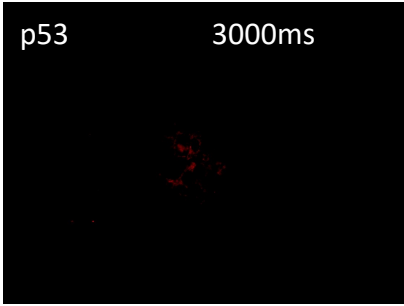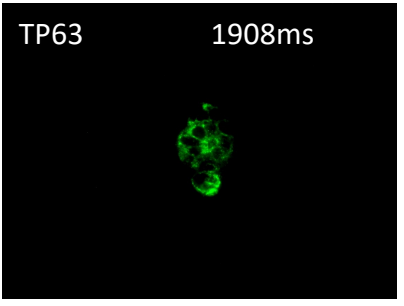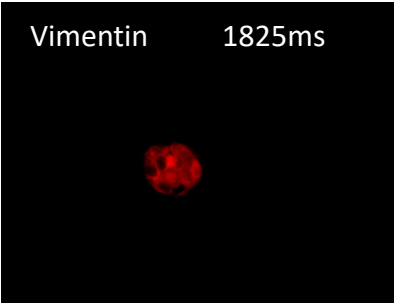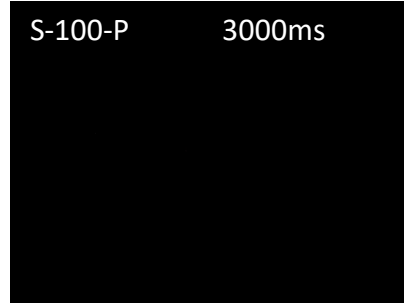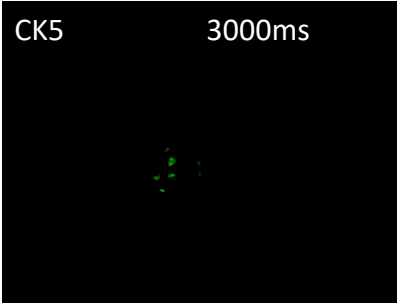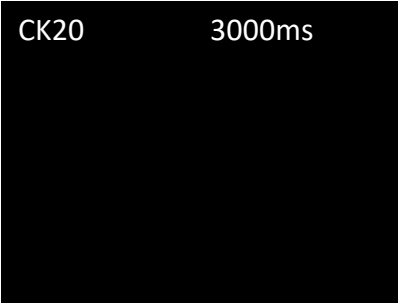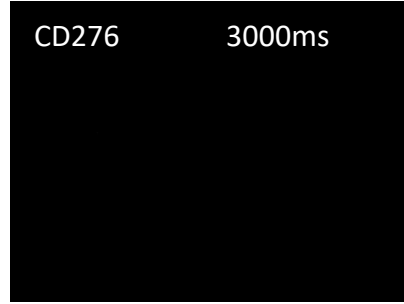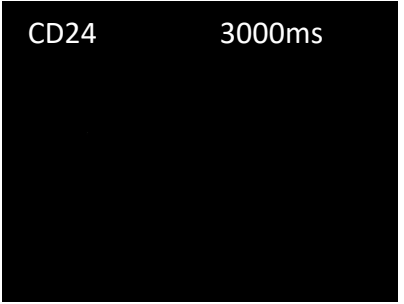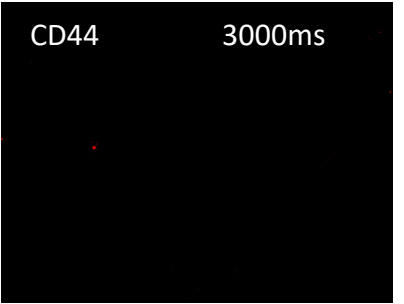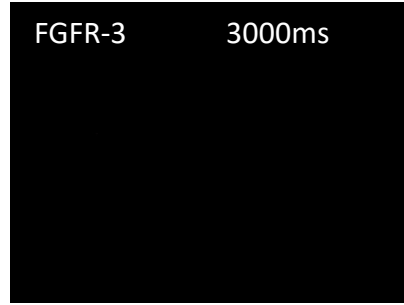

uBCO#15

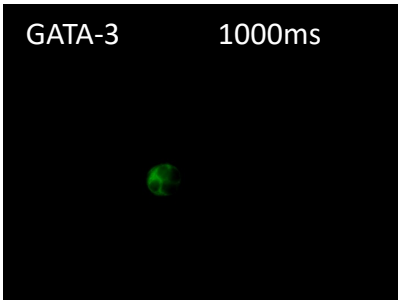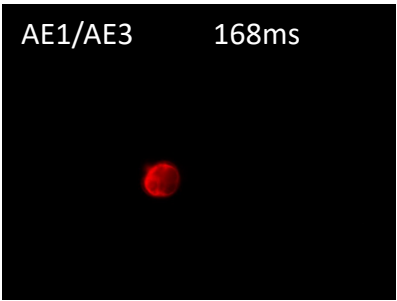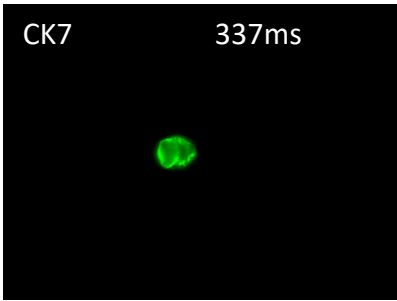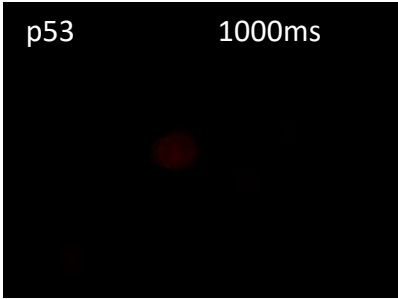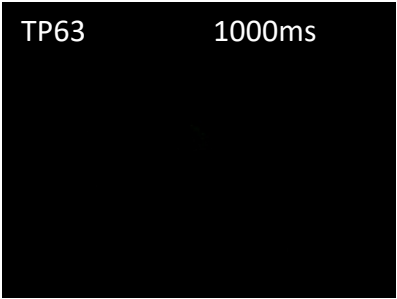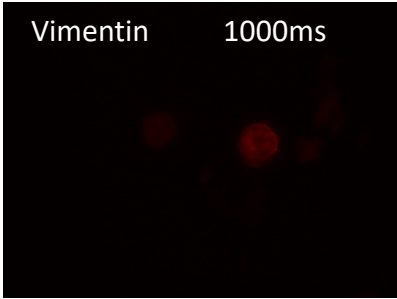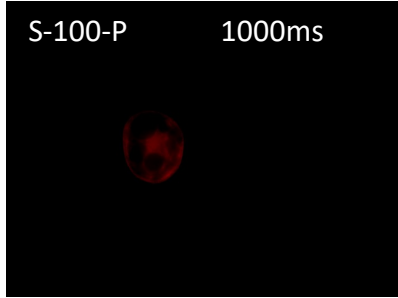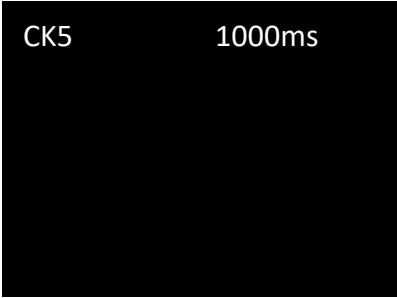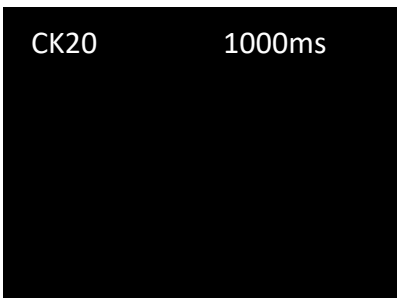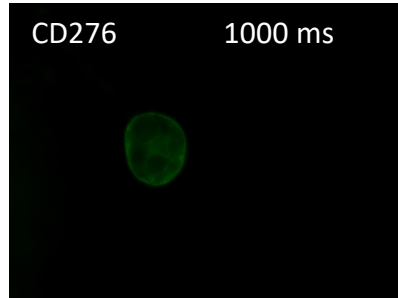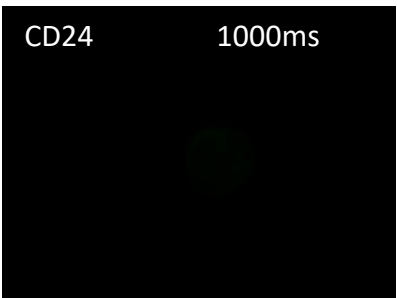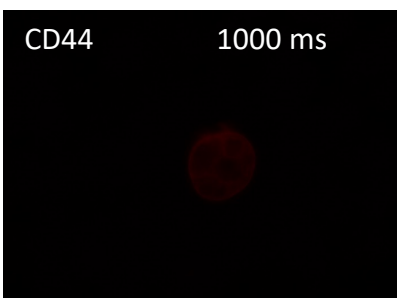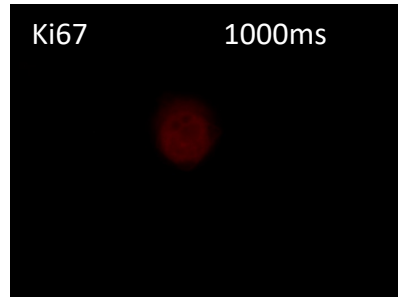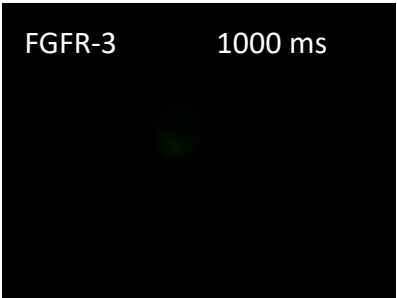

uBCO#19

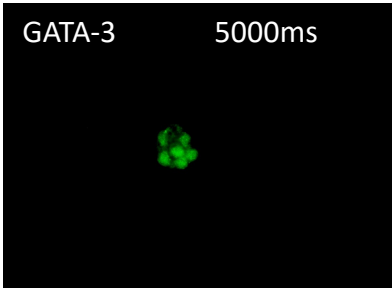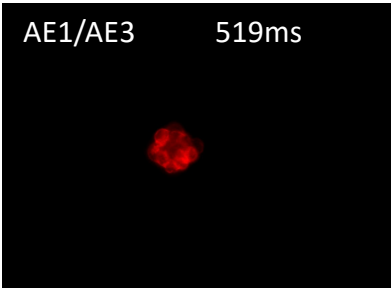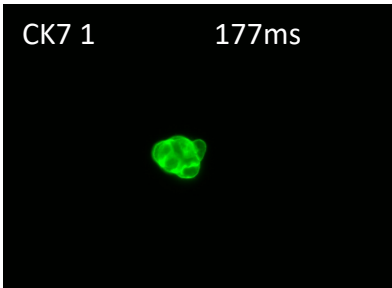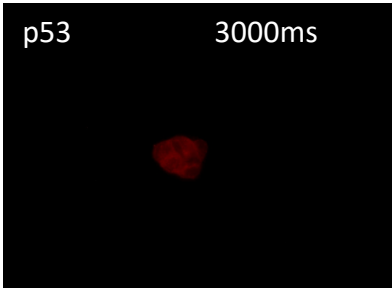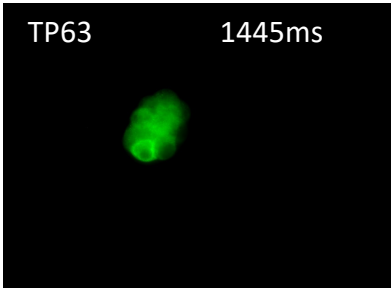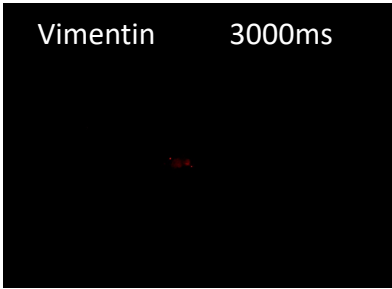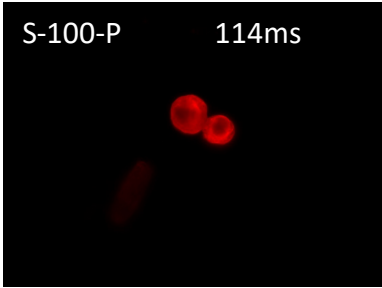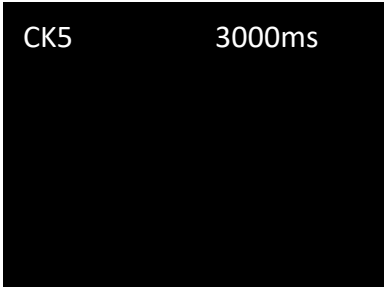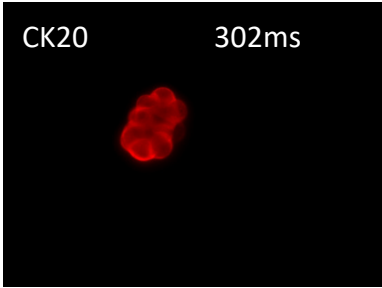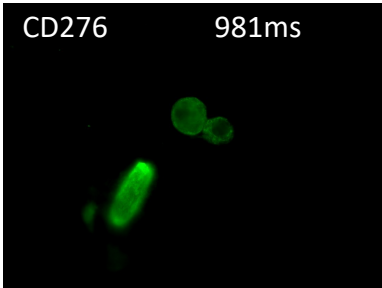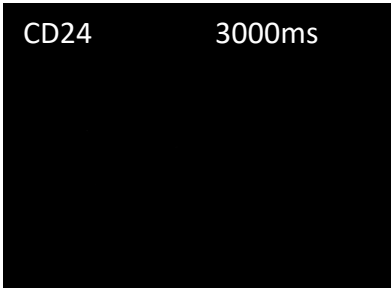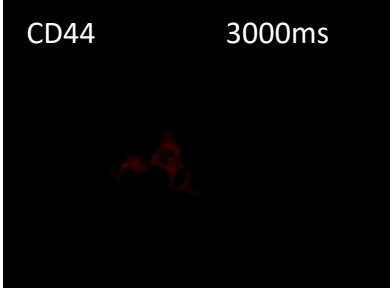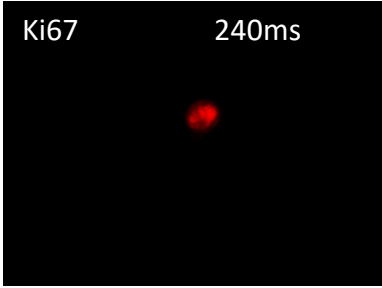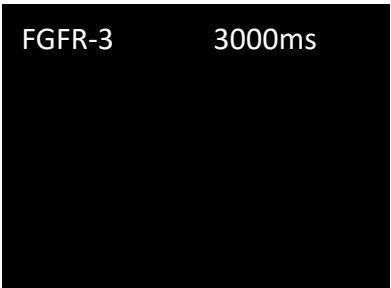

uBCO#22

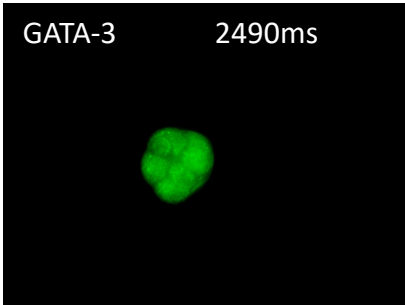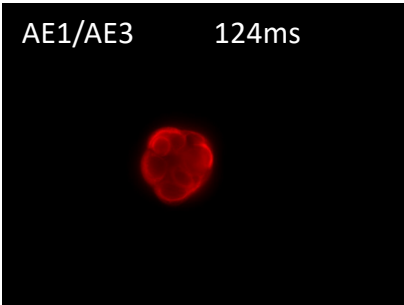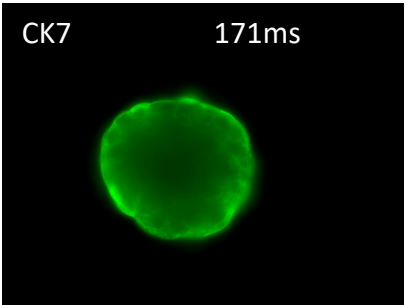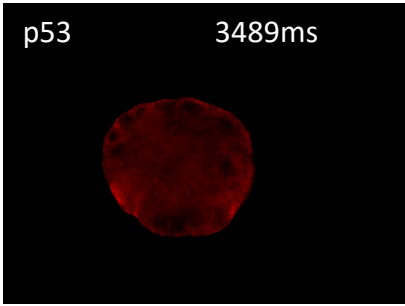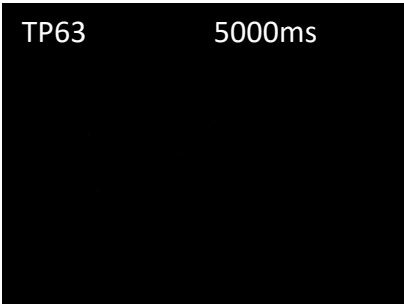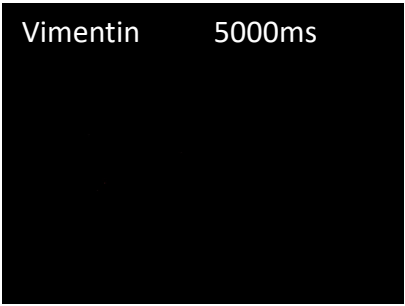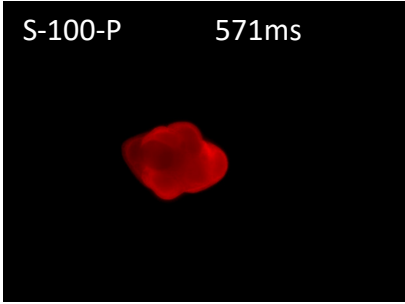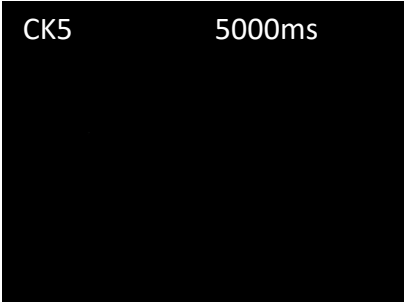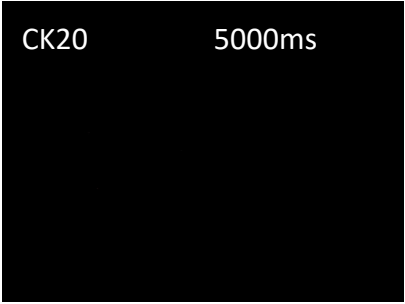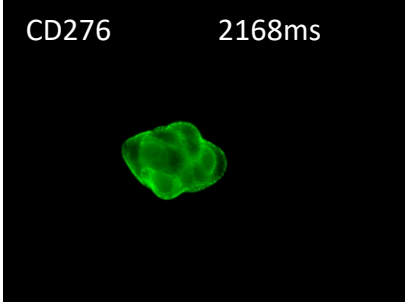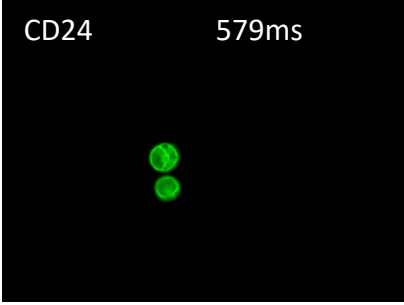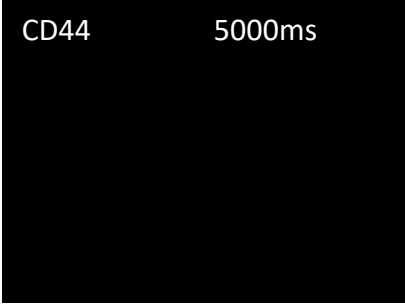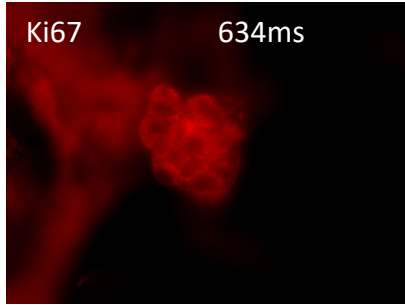

## uBCO#28

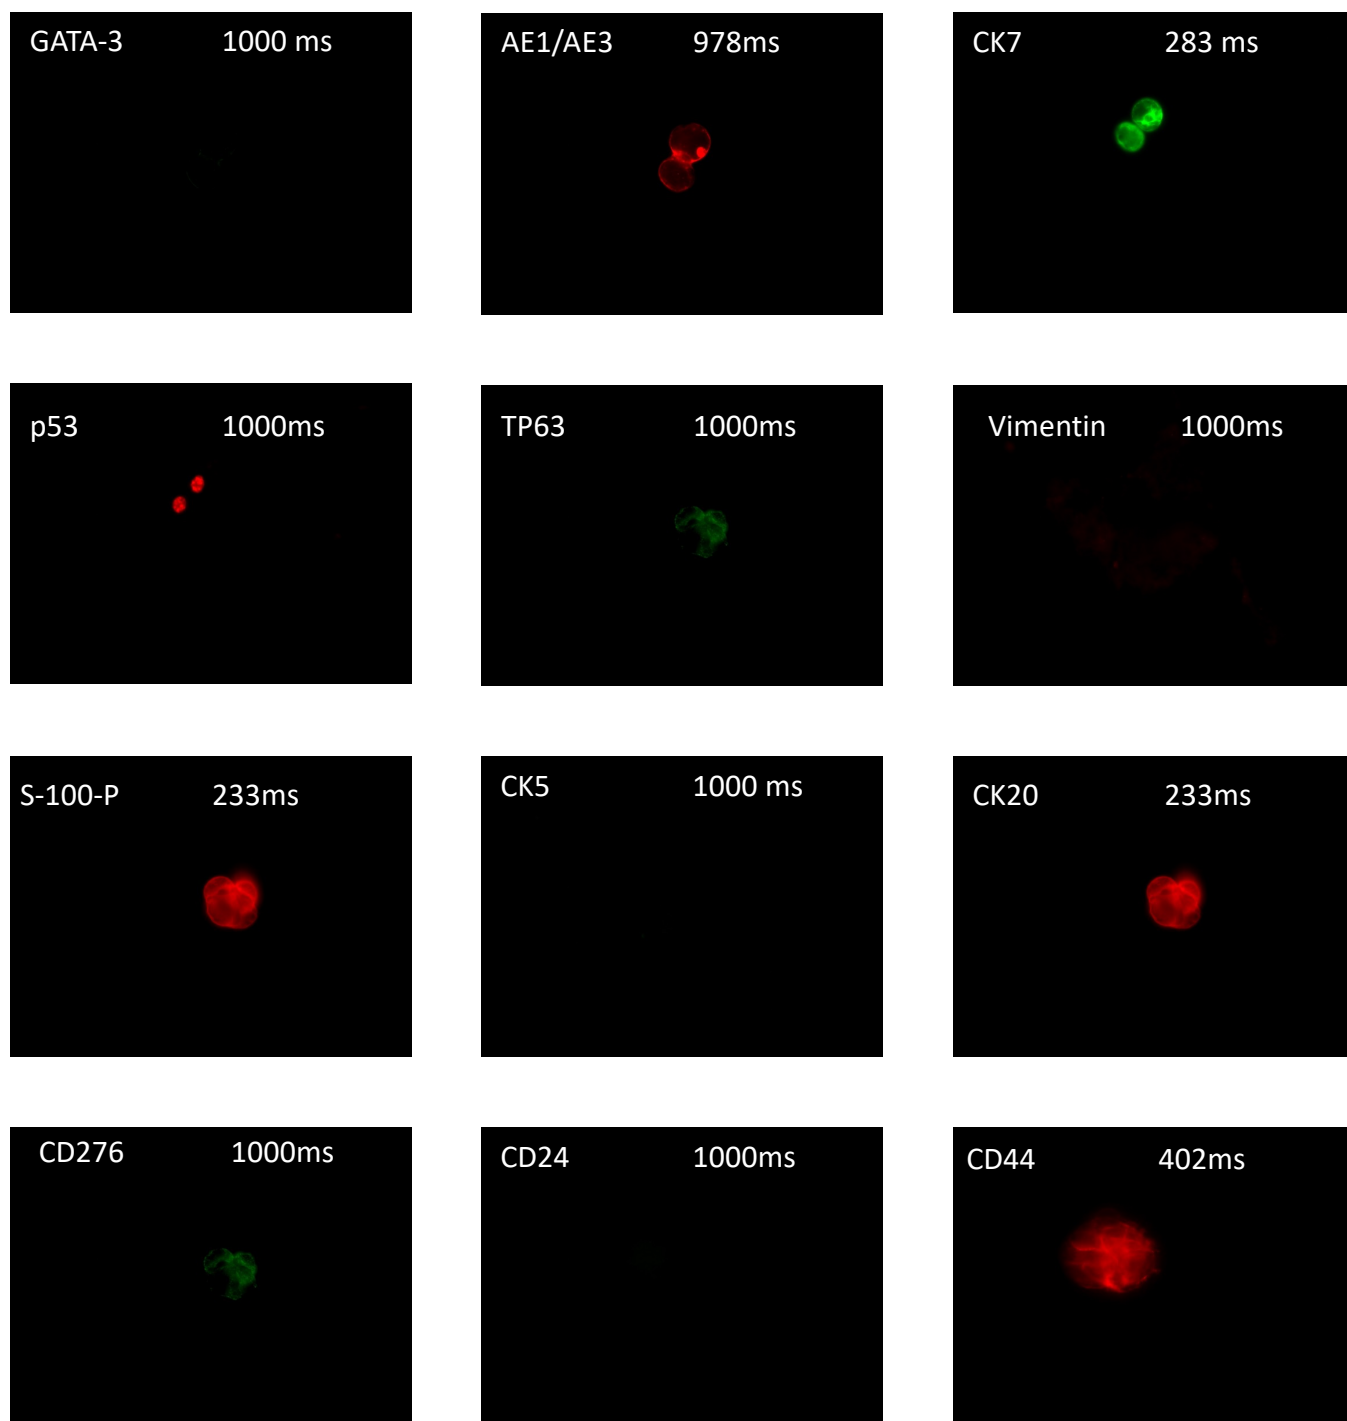

**Figure S2.** Immunofluorescence characterization of the uBCOs in chamber slides and their corresponding exposure times indicated in ms. Abbreviations: GATA, glutamyl amino transferase A; AE, anti-epithelial; p, protein; TP, tumor protein; CK, cytokeratin; CD, cluster of differentiation; uBCO, urine-derived bladder cancer organoid, Ki, Kiel; FGFR, fibroblast growth factor receptor; uBCO, urine-derived bladder cancer organoid; ms, millisecond.
